# Supplementary material for: From vanadium slag to multi-cation-intercalated V2O5·nH2O: low-cost direct synthesis and high-performance aqueous battery application
Source: Royal Society of Chemistry journal article supplement (doi:10.1039/d1ta10545k), 2022-01-01
Supplement: d1ta10545k1.pdf [file d1ta10545k1.pdf]

## Electronic Supplementary Information

### **From Vanadium Slag to Multi-Cations Intercalated $V_2O_5 \cdot nH_2O$ : Low-Cost Direct Synthesis and High-Performance Aqueous Battery Application**

Dong Chen,<sup>‡a</sup> Haoliang Chen,<sup>‡a</sup> Cheng-Feng Du,<sup>b</sup> Lin Liu,<sup>a</sup> Hongbo Geng,<sup>c</sup> Hong Yu,<sup>\*b</sup> and Xianhong Rui<sup>\*a</sup>

a. School of Materials and Energy, Guangdong University of Technology, Guangzhou 510006, China. E-mail: xhrui@gdut.edu.cn

b. Center of Advanced Lubrication and Seal Materials Northwestern Polytechnical University, Xi'an 710072, China. E-mail: yh@nwpu.edu.cn

c. School of Materials Engineering Changshu Institute of Technology Changshu, Jiangsu 215500, China.

<sup>‡</sup> D. Chen and H. Chen contributed equally to this work.

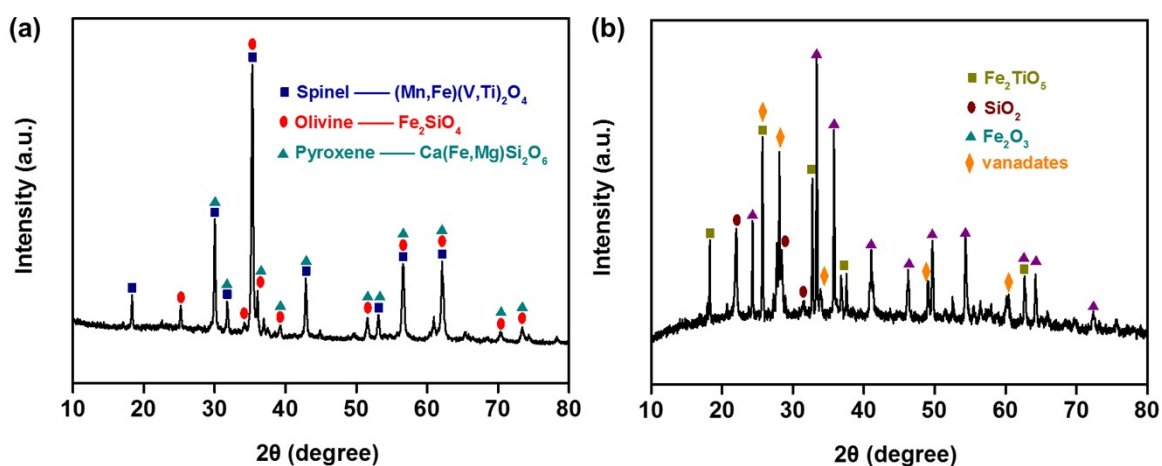

Fig. S1. XRD patterns of (a) original and (b) roasting vanadium slag.

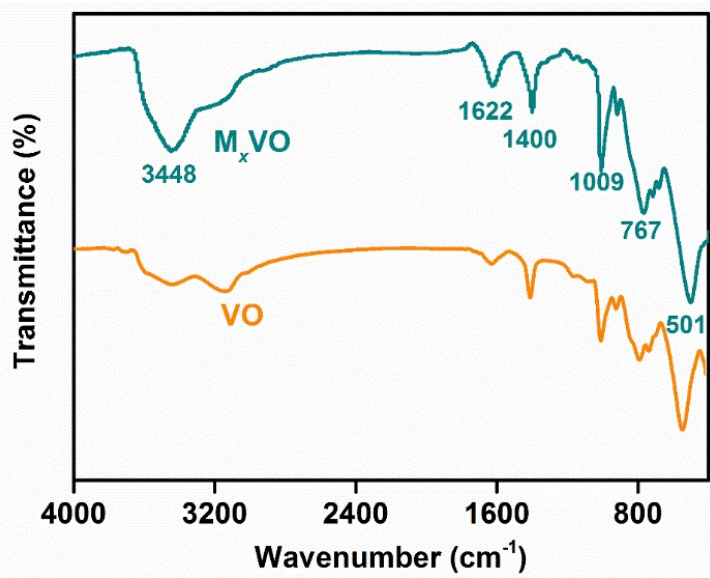

Fig. S2. FTIR spectrum of  $M_xVO$  and VO.

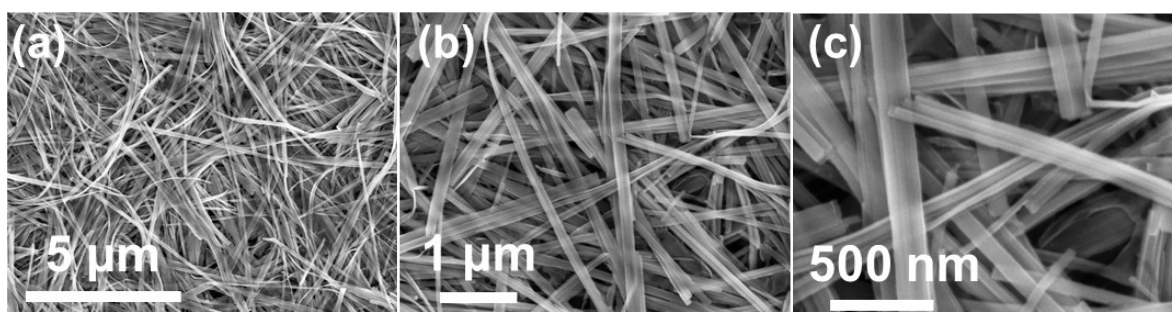

Fig. S3. SEM images of VO.

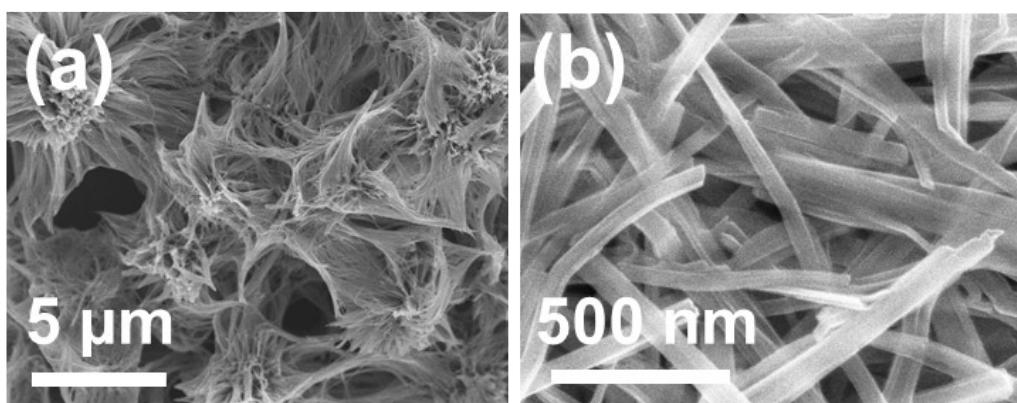

**Fig. S4.** SEM images of  $M_xVO$ .

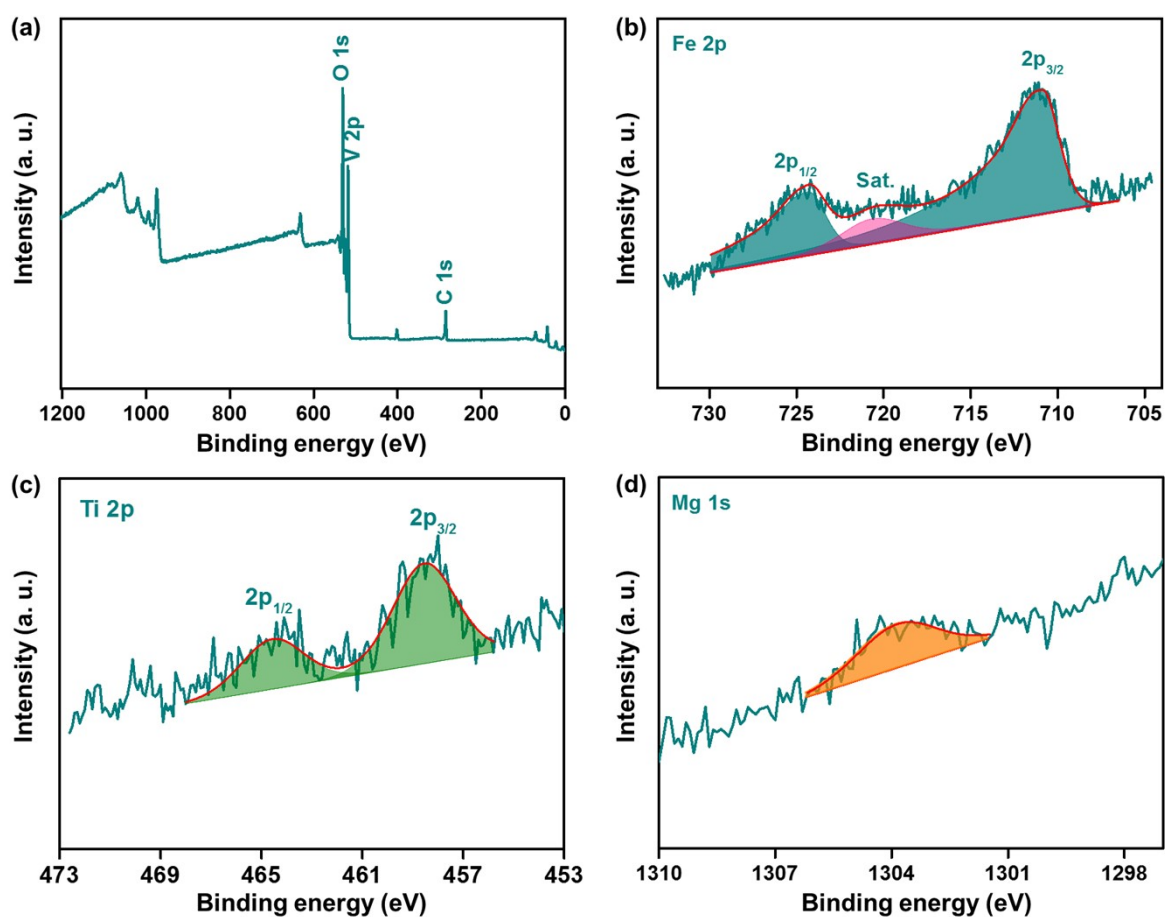

**Fig. S5.** XPS spectrum of  $M_xVO$ : (a) the survey scan spectrum and (b-d) high resolution spectrum of (b) Fe 2p, (c) Ti 2p and (d) Mg 1s.

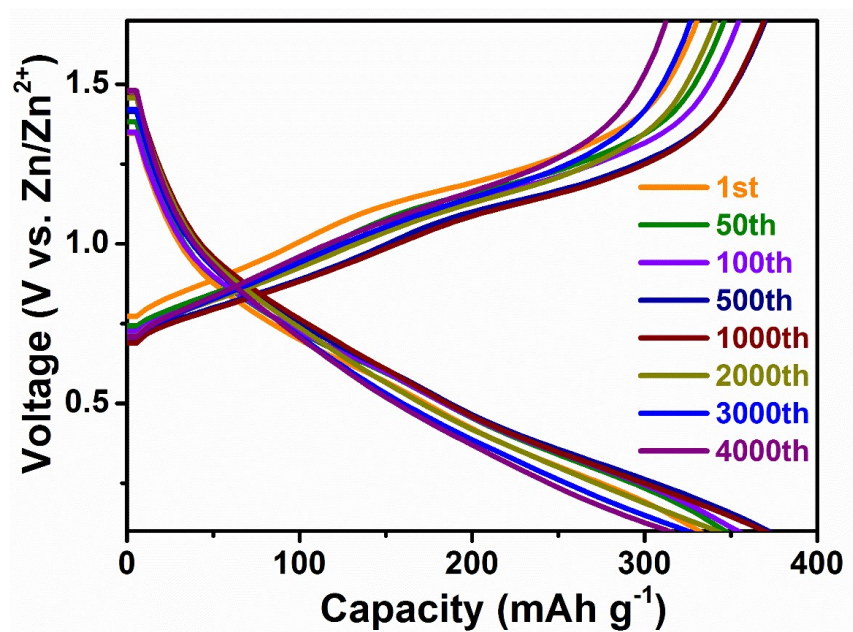

**Fig. S6.** Galvanostatic discharge and charge profiles of the  $M_xVO$  cathode at  $20 \text{ A g}^{-1}$ , whose shape are well maintained with good reversibility during long-term cycling process, illustrating an outstanding cycle stability.



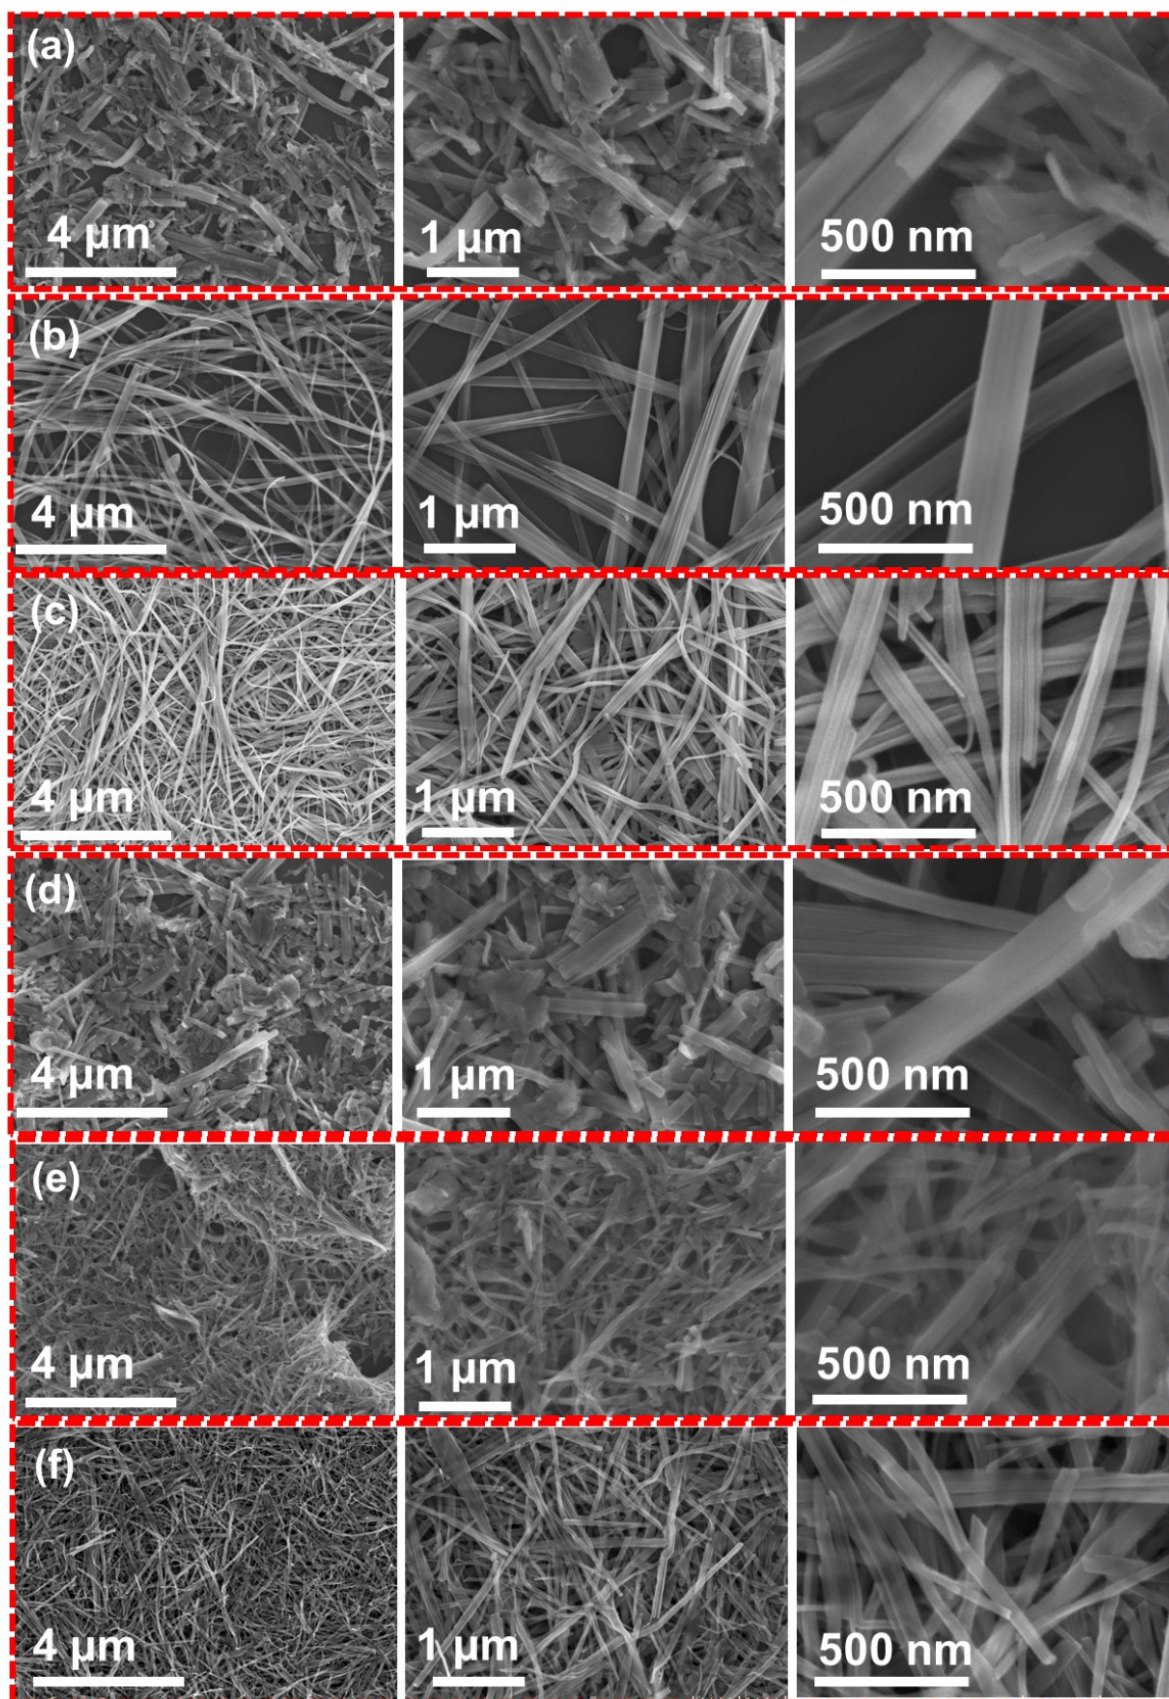

**Fig. S7.** SEM images of (a)  $Ti_xVO$ , (b)  $Mg_xVO$ , (c)  $Fe_xVO$ , (d)  $(Mg,Ti)_xVO$ , (e)  $(Fe,Ti)_xVO$  and (f)  $(Fe,Mg)_xVO$ .

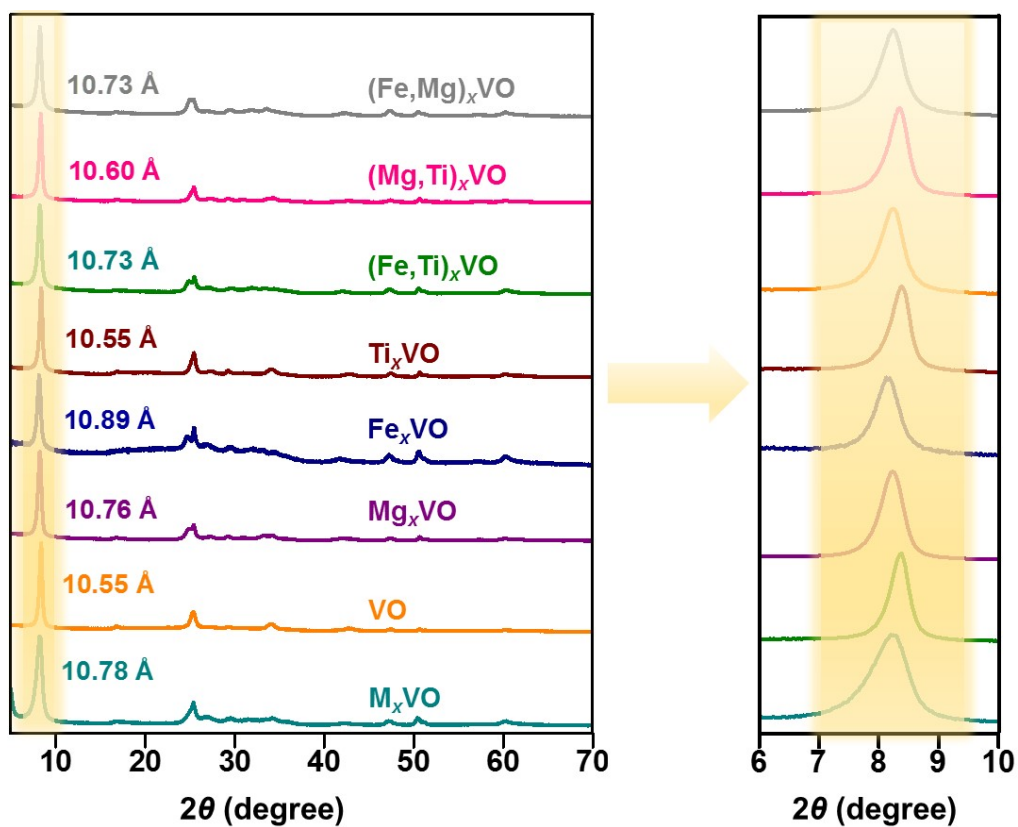

Fig. S8. XRD patterns of diverse hydrated vanadates.

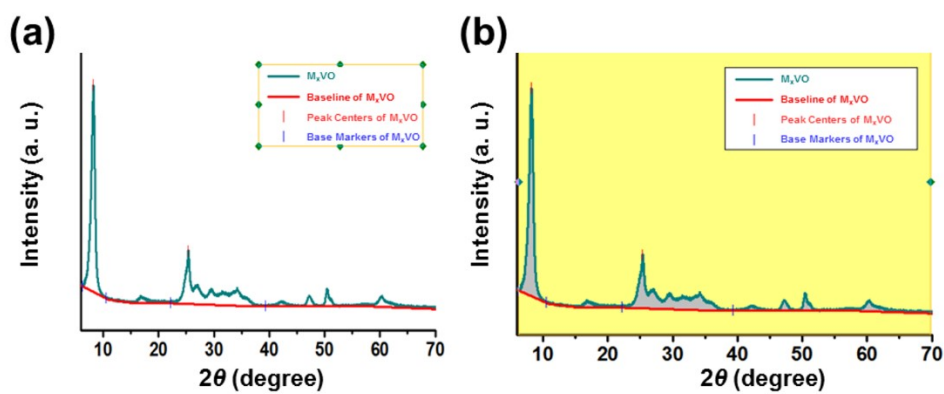

Fig. S9. Calculation process of crystallinity for the  $\text{M}_x\text{VO}$ . (a) Baseline adjustment, and (b) the total area under the peaks.

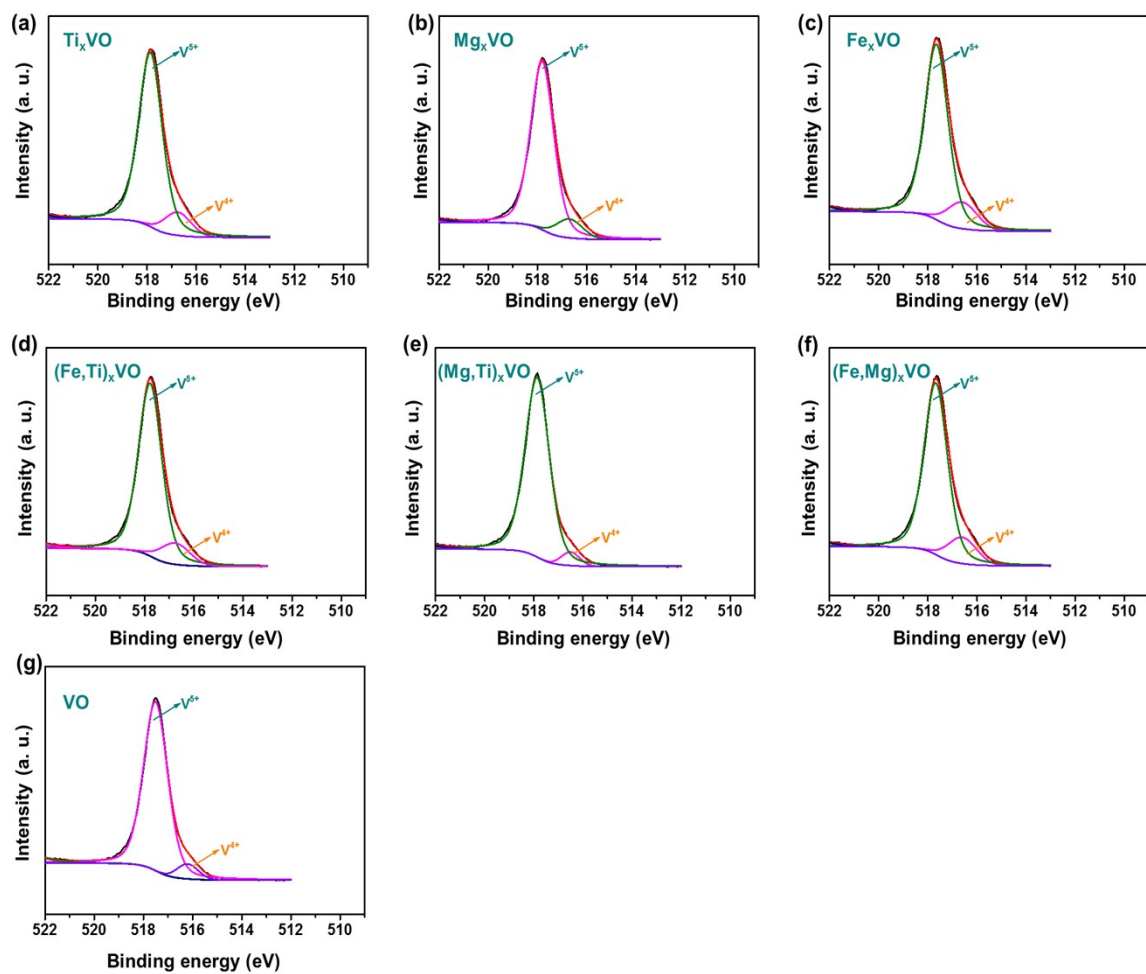

**Fig. S10.** XPS spectra of V  $2p_{3/2}$  region for (a)  $Ti_xVO$ , (b)  $Mg_xVO$ , (c)  $Fe_xVO$ , (d)  $(Fe,Ti)_xVO$ , (e)  $(Mg,Ti)_xVO$ , (f)  $(Fe,Mg)_xVO$ , and (g)  $VO$ .

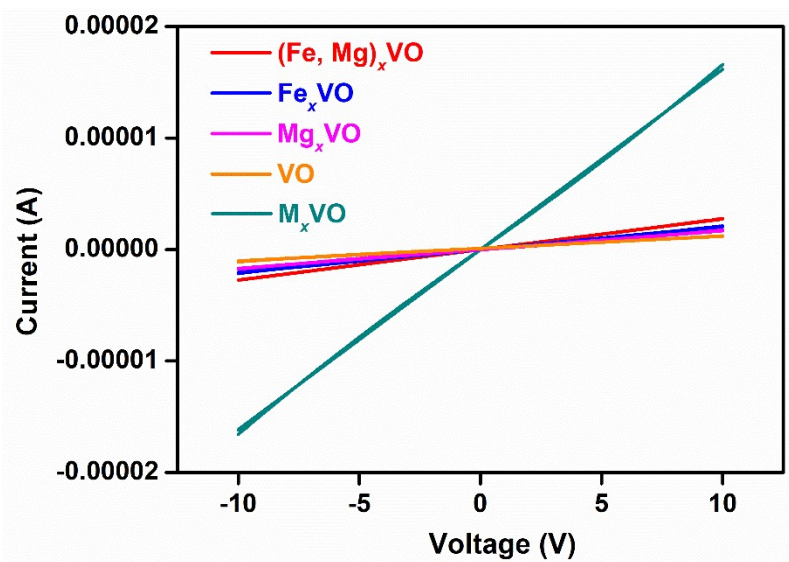

**Fig. S11.** Electrical conductivity of  $(\text{Fe, Mg})_x\text{VO}$ ,  $\text{Fe}_x\text{VO}$ ,  $\text{Mg}_x\text{VO}$ ,  $\text{VO}$  and  $\text{M}_x\text{VO}$ .



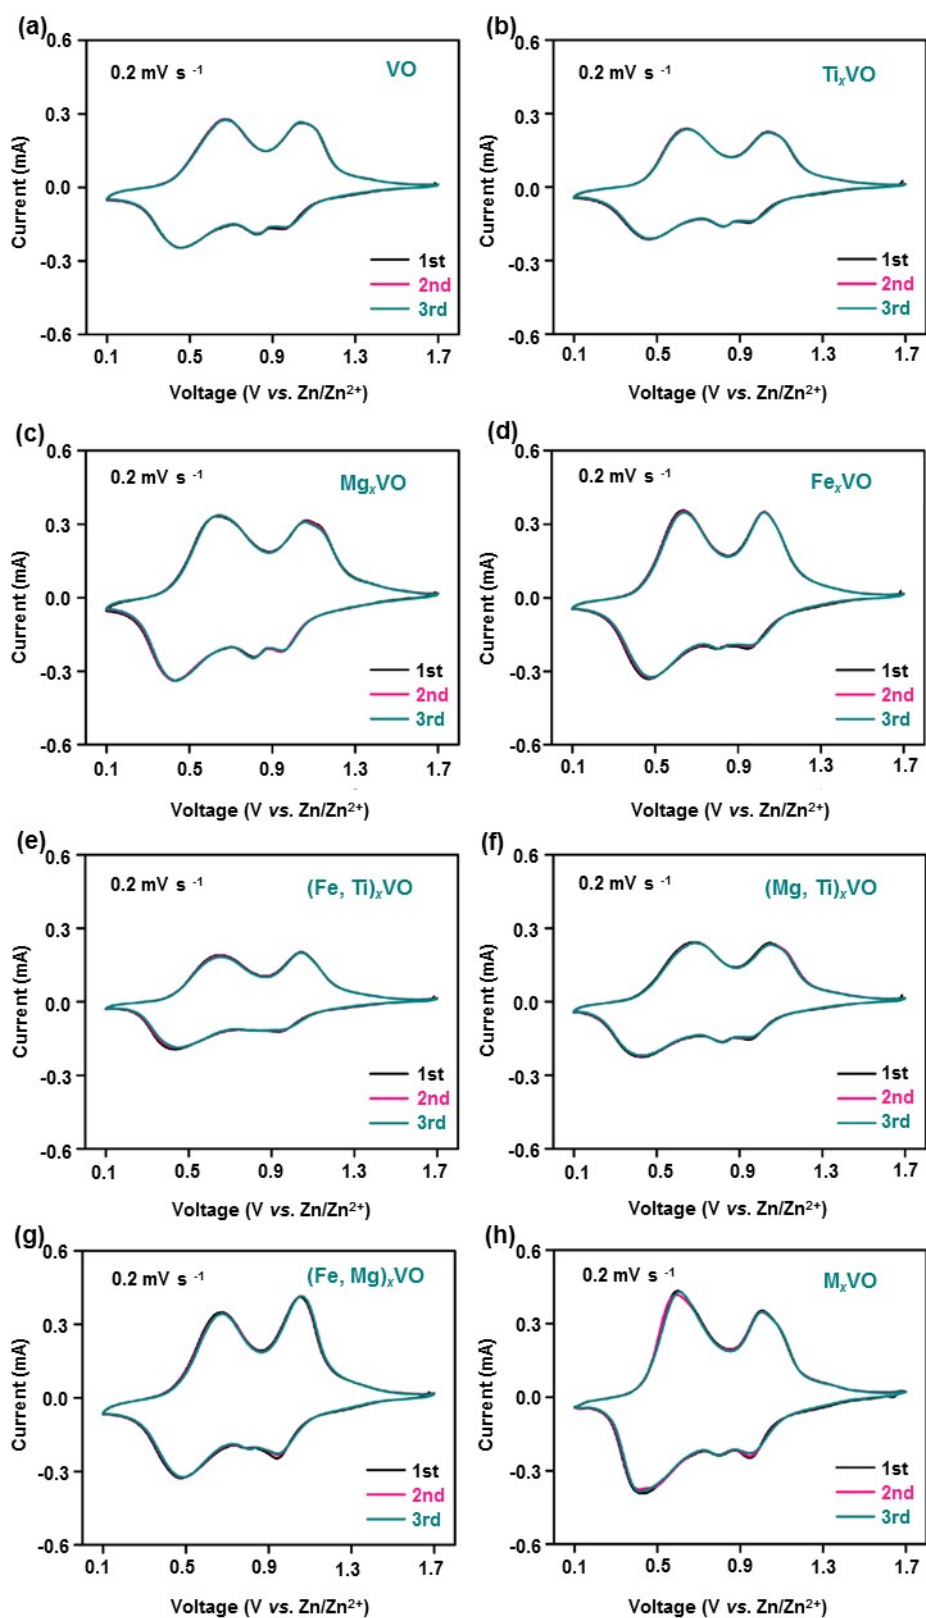

**Fig. S12.** CV curves at  $0.2 \text{ mV s}^{-1}$  in the potential range of 0.1-1.7V vs  $\text{Zn/Zn}^{2+}$  of (a) VO, (b)  $\text{Ti}_x\text{VO}$ , (c)  $\text{Mg}_x\text{VO}$ , (d)  $\text{Fe}_x\text{VO}$ , (e)  $(\text{Fe, Ti})_x\text{VO}$ , (f)  $(\text{Mg, Ti})_x\text{VO}$ , (g)  $(\text{Fe, Mg})_x\text{VO}$  and (h)  $\text{M}_x\text{VO}$ .

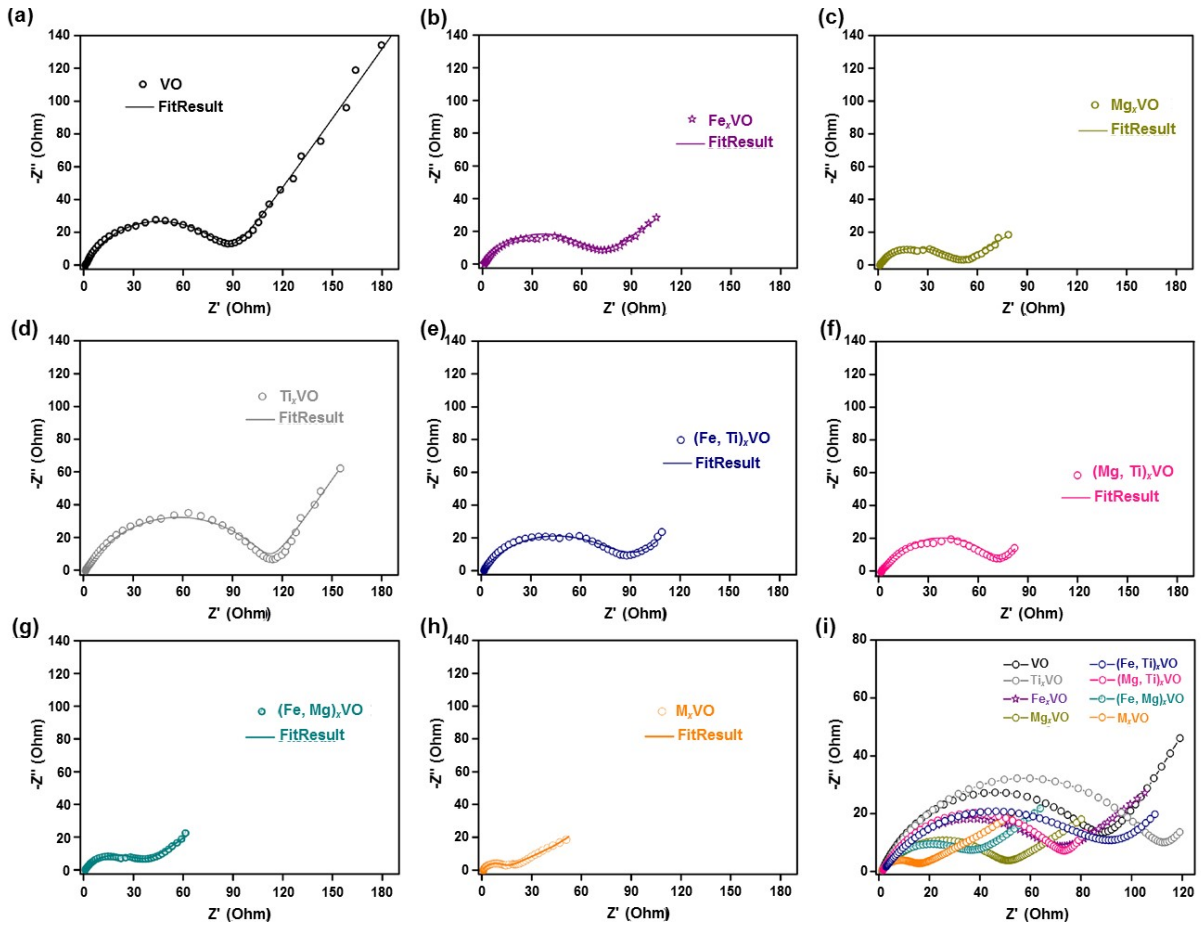

**Fig. S13.** A comparison of the electrochemical impedance spectra (EIS) in the pristine state of  $M_xVO$  electrode and as-simulated hydrated vanadate electrodes.

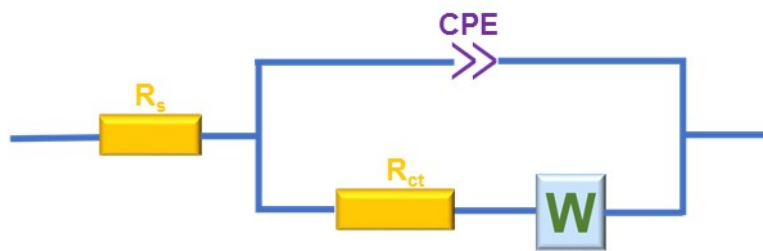

**Fig. S14.** The equivalent circuit used for fitting the above EIS curves (Fig. S11), in which  $R_s$  is bulk resistance,  $R_{ct}$  is charge transfer resistance, CPE is constant phase element, and W is Warburg impedance.

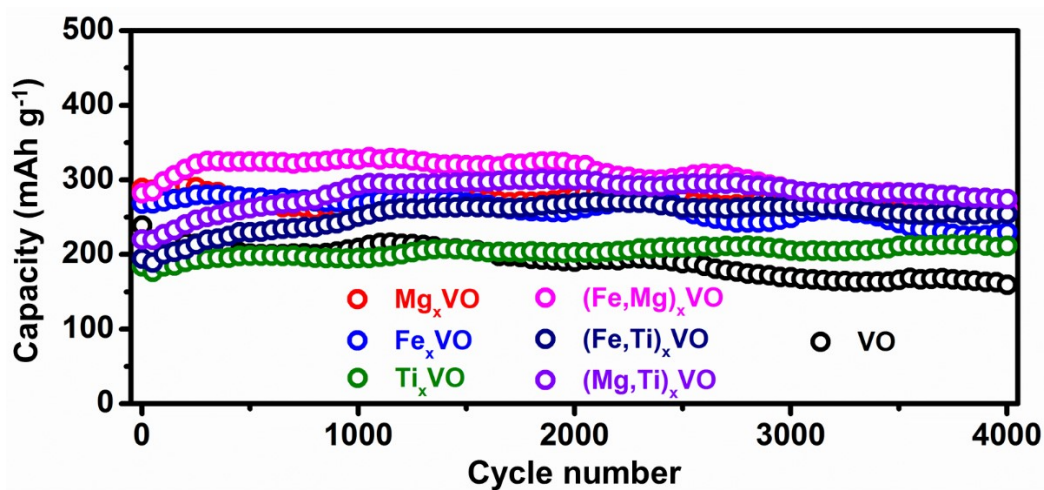

**Fig. S15.** Long-term cycling performance at 20 A g<sup>-1</sup> of the as-simulated cations pre-intercalated hydrated vanadate samples.

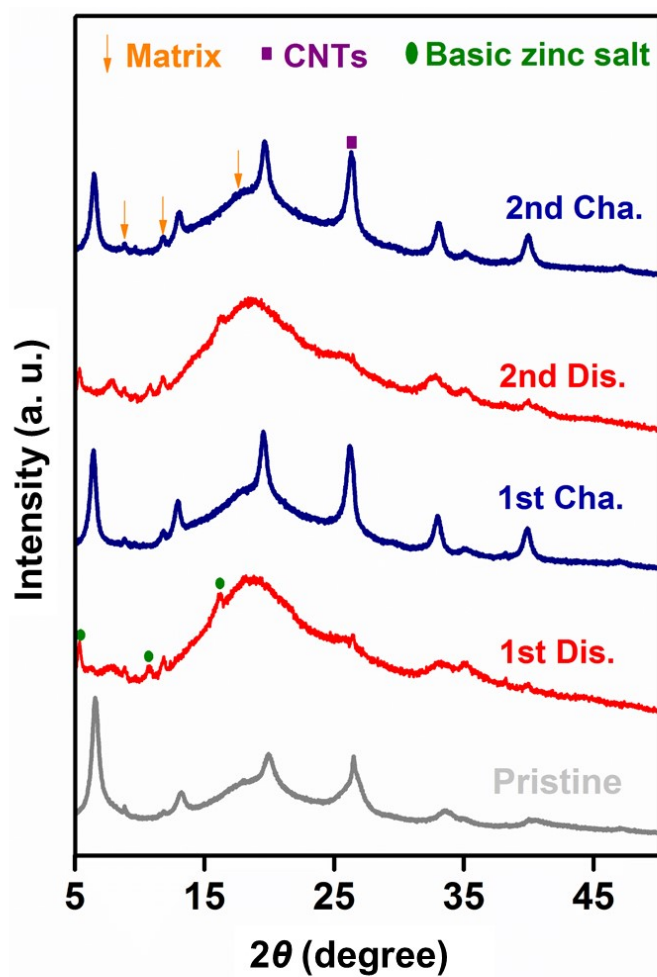

**Fig. S16.** The XRD patterns of M<sub>x</sub>VO electrode at different states.

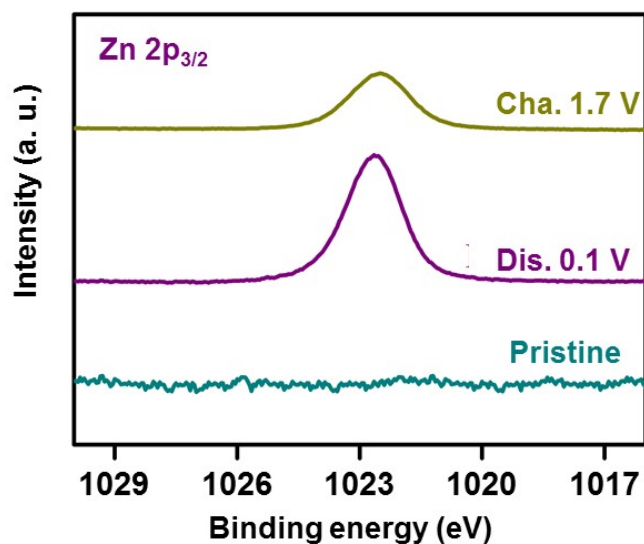

**Fig. S17.** High-resolution Zn 2p XPS spectra of  $M_xVO$  electrode at pristine, fully discharged and fully charged states.

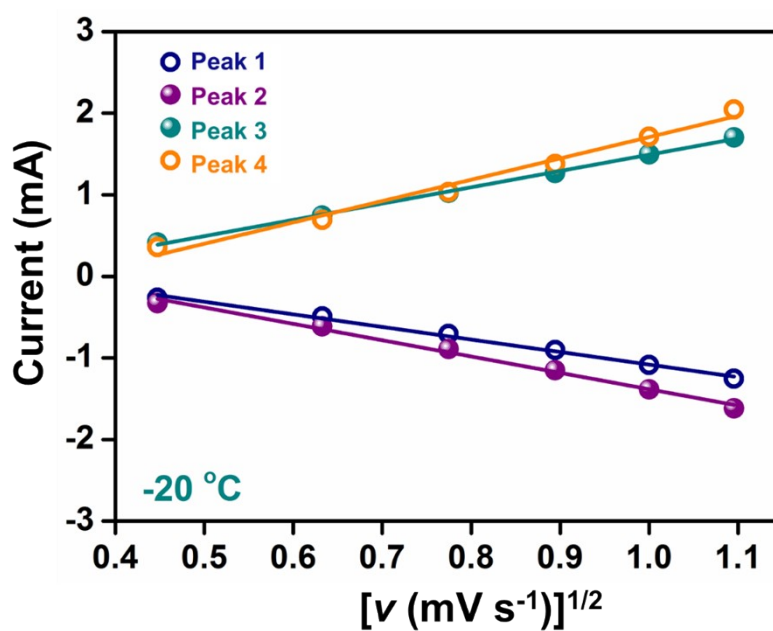

**Fig. S18.** I (current density) vs.  $v^{1/2}$  (scan rate) fitting plots based on four peaks in Fig. 5b.



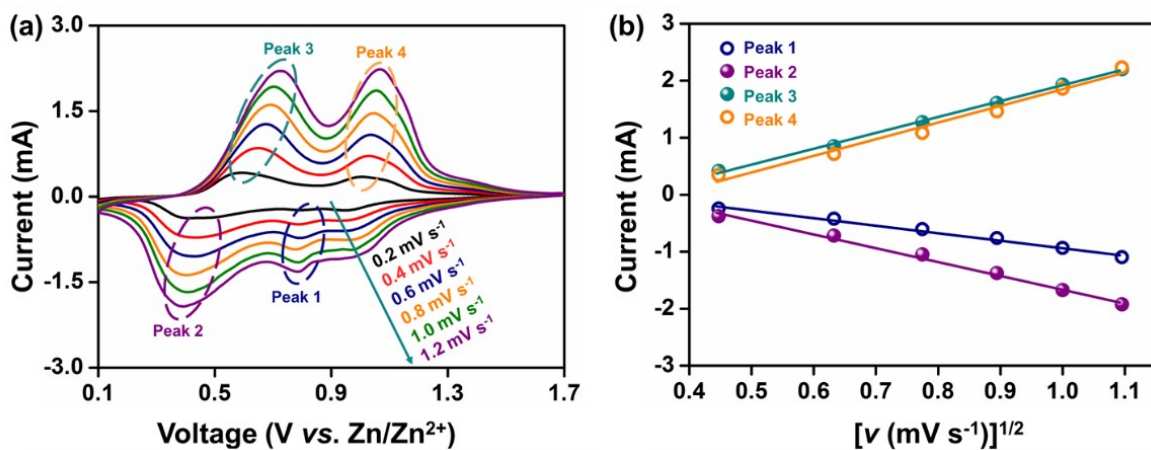

**Fig. S19** (a) CV curves at different scan rates in the potential range of 0.1-1.7 V vs. Zn/Zn<sup>2+</sup> at room temperature, (b) I (current density) vs.  $v^{1/2}$  (scan rate) fitting plots based on four peaks.

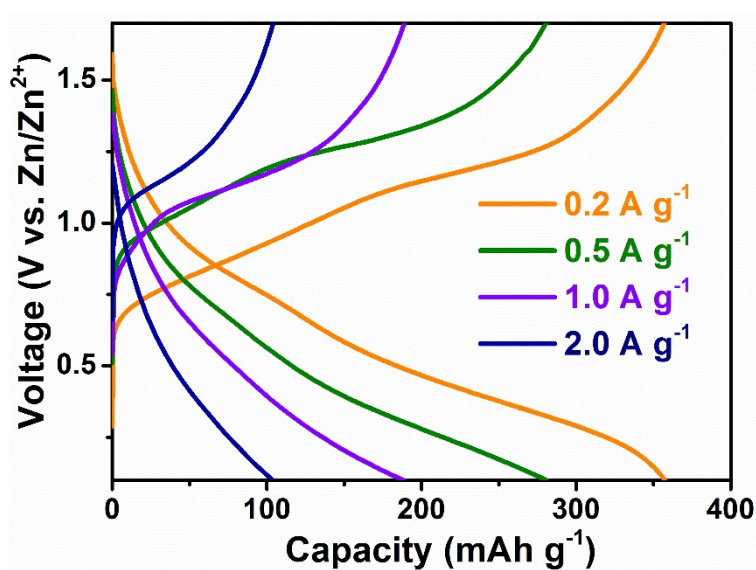

**Fig. S20.** Galvanostatic discharge and charge profiles of the pouch cell at various current densities.

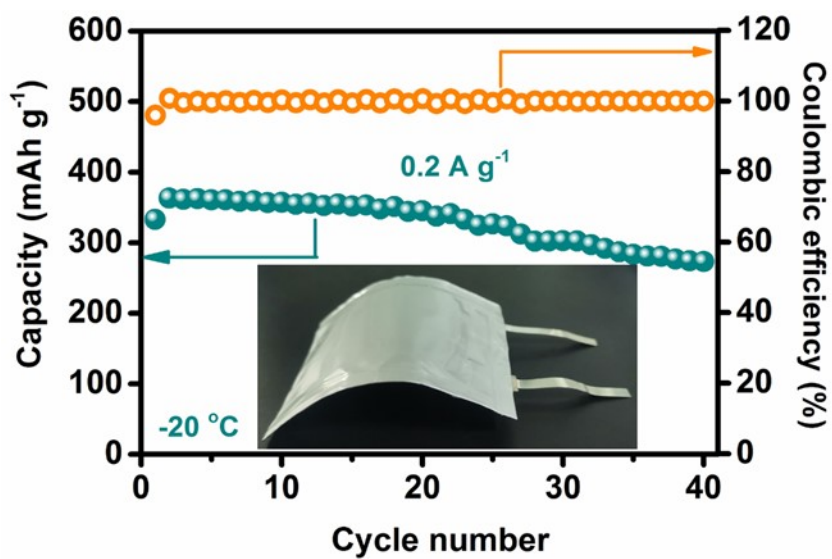

**Fig. S21.** Cycling performance at  $0.2 \text{ A g}^{-1}$  of Zn/M<sub>x</sub>VO pouch cell under bending.

**Table S1.** The chemical composition of vanadium slag.

| Analyte | Concentration (%) | Analyte | Concentration (%) |
|---------|-------------------|---------|-------------------|
| Fe      | 12.954            | Al      | 0.995             |
| V       | 4.474             | Ca      | 0.765             |
| Ti      | 3.209             | Mg      | 0.729             |
| Si      | 3.105             | O       | 70.819            |
| Mn      | 2.642             | Others  | 0.308             |

**Table S2.** Qualitative analysis of  $M_xVO$  by XRF.

| Analyte           | V      | Fe    | Ti    | Mg    | O      |
|-------------------|--------|-------|-------|-------|--------|
| Concentration (%) | 22.739 | 0.220 | 0.047 | 0.029 | 76.965 |

**Table S3.** Quantitative analysis of  $M_xVO$  by ICP-AES.

| Analyte | M (mg/kg) | V (mg/kg) | M/V (mole ratio) |
|---------|-----------|-----------|------------------|
| Fe      | 9706.0    |           | 0.016            |
| Ti      | 1444.6    | 536645.5  | 0.003            |
| Mg      | 289.0     |           | 0.001            |

**Table S4.** A comparison of electrochemical performance of  $M_xVO$  with that of the currently representative vanadium-based cathodes.

| Cathode                                                                                          | Cycling stability                                                         | Rate performance                                             |
|--------------------------------------------------------------------------------------------------|---------------------------------------------------------------------------|--------------------------------------------------------------|
| <b><math>M_xVO</math></b>                                                                        | <b>262 mAh g<sup>-1</sup> @ 20 A g<sup>-1</sup>, 4000 cycles (30 °C)</b>  | <b>203 mAh g<sup>-1</sup> @ 100 A g<sup>-1</sup> (30 °C)</b> |
|                                                                                                  | <b>230 mAh g<sup>-1</sup> @ 10 A g<sup>-1</sup>, 1000 cycles (-20 °C)</b> | <b>121 mAh g<sup>-1</sup> @ 50 A g<sup>-1</sup> (-20 °C)</b> |
| MnVOH <sup>1</sup>                                                                               | 260 mAh g <sup>-1</sup> @ 4 A g <sup>-1</sup> , 2000 cycles               | 214 mAh g <sup>-1</sup> @ 8 A g <sup>-1</sup>                |
| AlVOH <sup>2</sup>                                                                               | 236 mAh g <sup>-1</sup> @ 4 A g <sup>-1</sup> , 3000 cycles               | 195 mAh g <sup>-1</sup> @ 8 A g <sup>-1</sup>                |
| VO <sub>2</sub> <sup>3</sup>                                                                     | 250 mAh g <sup>-1</sup> @ 2 A g <sup>-1</sup> , 300 cycles                | 171 mAh g <sup>-1</sup> @ 51.2 A g <sup>-1</sup>             |
| VN <sub>0.9</sub> O <sub>0.15</sub> <sup>4</sup>                                                 | 139 mAh g <sup>-1</sup> @ 4 A g <sup>-1</sup> , 1500 cycles               | 124 mAh g <sup>-1</sup> @ 102.4 A g <sup>-1</sup>            |
| ZVO <sup>5</sup>                                                                                 | 214 mAh g <sup>-1</sup> @ 10 A g <sup>-1</sup> , 20000 cycles             | 265 mAh g <sup>-1</sup> @ 10 A g <sup>-1</sup>               |
| (Na,Mn)V <sub>8</sub> O <sub>20</sub> ·nH <sub>2</sub> O <sup>6</sup>                            | 128 mAh g <sup>-1</sup> @ 4 A g <sup>-1</sup> , 1000 cycles               | 146 mAh g <sup>-1</sup> @ 8 A g <sup>-1</sup>                |
| Ag <sub>0.4</sub> V <sub>2</sub> O <sub>5</sub> <sup>7</sup>                                     | 144 mAh g <sup>-1</sup> @ 20 A g <sup>-1</sup> , 4000 cycles              | 180 mAh g <sup>-1</sup> @ 2 A g <sup>-1</sup>                |
| V <sub>2</sub> O <sub>5</sub> <sup>8</sup>                                                       | 169 mAh g <sup>-1</sup> @ 10 A g <sup>-1</sup> , 500 cycles               | 219 mAh g <sup>-1</sup> @ 10 A g <sup>-1</sup>               |
| Li <sub>x</sub> V <sub>2</sub> O <sub>5</sub> ·nH <sub>2</sub> O <sup>9</sup>                    | 192 mAh g <sup>-1</sup> @ 10 A g <sup>-1</sup> , 1000 cycles              | 170 mAh g <sup>-1</sup> @ 10 A g <sup>-1</sup>               |
| V <sub>6</sub> O <sub>13</sub> <sup>10</sup>                                                     | 230 mAh g <sup>-1</sup> @ 4 A g <sup>-1</sup> , 2000 cycles               | 145 mAh g <sup>-1</sup> @ 24 A g <sup>-1</sup>               |
| Mg <sub>x</sub> V <sub>2</sub> O <sub>5</sub> ·nH <sub>2</sub> O <sup>11</sup>                   | 90 mAh g <sup>-1</sup> @ 5 A g <sup>-1</sup> , 2000 cycles                | 81 mAh g <sup>-1</sup> @ 5 A g <sup>-1</sup>                 |
| NaV <sub>3</sub> O <sub>8</sub> ·1.5H <sub>2</sub> O <sup>12</sup>                               | 135 mAh g <sup>-1</sup> @ 4 A g <sup>-1</sup> , 1000 cycles               | 165 mAh g <sup>-1</sup> @ 4 A g <sup>-1</sup>                |
| Na <sub>0.33</sub> V <sub>2</sub> O <sub>5</sub> <sup>13</sup>                                   | 218 mAh g <sup>-1</sup> @ 1 A g <sup>-1</sup> , 1000 cycles               | 96 mAh g <sup>-1</sup> @ 2 A g <sup>-1</sup>                 |
| VS <sub>4</sub> @rGO <sup>14</sup>                                                               | 168 mAh g <sup>-1</sup> @ 1 A g <sup>-1</sup> , 165 cycles                | 200 mAh g <sup>-1</sup> @ 2 A g <sup>-1</sup>                |
| Zn <sub>2</sub> V <sub>2</sub> O <sub>7</sub> <sup>15</sup>                                      | 138 mAh g <sup>-1</sup> @ 4 A g <sup>-1</sup> , 1000 cycles               | 170 mAh g <sup>-1</sup> @ 4.4 A g <sup>-1</sup>              |
| V <sub>2</sub> O <sub>5</sub> ·nH <sub>2</sub> O <sup>16</sup>                                   | 200 mAh g <sup>-1</sup> @ 6 A g <sup>-1</sup> , 900 cycles                | 248 mAh g <sup>-1</sup> @ 30 A g <sup>-1</sup>               |
| VO <sub>2</sub> <sup>17</sup>                                                                    | 86 mAh g <sup>-1</sup> @ 3 A g <sup>-1</sup> , 5000 cycles                | 72 mAh g <sup>-1</sup> @ 5 A g <sup>-1</sup>                 |
| (NH <sub>4</sub> ) <sub>2</sub> V <sub>10</sub> O <sub>25</sub> ·8H <sub>2</sub> O <sup>18</sup> | 90 mAh g <sup>-1</sup> @ 5 A g <sup>-1</sup> , 5000 cycles                | 124 mAh g <sup>-1</sup> @ 5 A g <sup>-1</sup>                |
| C-KVO O <sub>d</sub> <sup>19</sup>                                                               | 245 mAh g <sup>-1</sup> @ 3 A g <sup>-1</sup> , 1000 cycles               | 166 mAh g <sup>-1</sup> @ 20 A g <sup>-1</sup>               |
| PEDOT-NH <sub>4</sub> V <sub>3</sub> O <sub>8</sub> <sup>20</sup>                                | 161 mAh g <sup>-1</sup> @ 10 A g <sup>-1</sup> , 5000 cycles              | 164 mAh g <sup>-1</sup> @ 10 A g <sup>-1</sup>               |
| P-V <sub>2</sub> O <sub>3</sub> @C <sup>21</sup>                                                 | 158 mAh g <sup>-1</sup> @ 5 A g <sup>-1</sup> , 4000 cycles               | 228 mAh g <sup>-1</sup> @ 2 A g <sup>-1</sup>                |



**Table S5.** Quantitative analysis of hydrothermal solutions by ICP-AES (mg/L).

| Analyte | 1       | 2       | 3       |         |
|---------|---------|---------|---------|---------|
| Fe      | 38.65   | 24.21   | 29.94   | 30.93   |
| Ti      | 4.85    | 5.14    | 4.78    | 4.92    |
| Mg      | 170.35  | 203.78  | 185.48  | 186.54  |
| V       | 1518.59 | 1691.87 | 1599.20 | 1603.22 |

**Table S6.** A comparison of the crystallinity.

| Sample            | VO    | Ti <sub>x</sub> VO | Mg <sub>x</sub> VO | Fe <sub>x</sub> VO | (Fe,Ti) <sub>x</sub> VO | (Mg,Ti) <sub>x</sub> VO | (Fe,Mg) <sub>x</sub> VO | M <sub>x</sub> VO |
|-------------------|-------|--------------------|--------------------|--------------------|-------------------------|-------------------------|-------------------------|-------------------|
| Crystallinity (%) | 99.91 | 99.88              | 99.92              | 99.95              | 99.90                   | 99.88                   | 99.91                   | 99.89             |

**Table S7.** A comparison of the average valence state of V.

| Sample                | VO   | Ti <sub>x</sub> VO | Mg <sub>x</sub> VO | Fe <sub>x</sub> VO | (Fe,Ti) <sub>x</sub> VO | (Mg,Ti) <sub>x</sub> VO | (Fe,Mg) <sub>x</sub> VO | M <sub>x</sub> VO |
|-----------------------|------|--------------------|--------------------|--------------------|-------------------------|-------------------------|-------------------------|-------------------|
| Average valence state | 4.93 | 4.89               | 4.90               | 4.86               | 4.88                    | 4.94                    | 4.86                    | 4.92              |

**Table S8.** Simulated parameters from EIS curves in Fig. S12 using equivalent circuit.

| Sample                  | $R_s$ ( $\Omega$ ) | CPE ( $\mu$ F) | $R_{ct}$ ( $\Omega$ ) |
|-------------------------|--------------------|----------------|-----------------------|
| VO                      | 1                  | 7              | 88                    |
| Ti <sub>x</sub> VO      | 1                  | 7              | 112                   |
| Mg <sub>x</sub> VO      | 1                  | 5              | 48                    |
| Fe <sub>x</sub> VO      | 1                  | 6              | 69                    |
| (Fe,Ti) <sub>x</sub> VO | 2                  | 6              | 80                    |
| (Mg,Ti) <sub>x</sub> VO | 2                  | 6              | 72                    |
| (Fe,Mg) <sub>x</sub> VO | 1                  | 6              | 35                    |
| M <sub>x</sub> VO       | 1                  | 6              | 13                    |

**Table S9.** Comparison of the diffusion coefficient ( $D_{Zn^{2+}}$ ) with some reported electrode materials.

| Electrode Materials                               | $D_{Zn^{2+}}$ (cm <sup>2</sup> s <sup>-1</sup> ) | Ref.      |
|---------------------------------------------------|--------------------------------------------------|-----------|
| $M_xVO$                                           | $10^{-6} \sim 10^{-8}$ (-20 °C)                  | This work |
| $K_{1.14}(VO)_{3.33}[Fe(CN)_6]_2 \cdot 6.8H_2O$   | $10^{-9} \sim 10^{-14}$                          | 22        |
| $Mn_{0.15}V_2O_5 \cdot nH_2O$                     | $10^{-10} \sim 10^{-12}$                         | 23        |
| Graphene Scroll Coated $\alpha$ -MnO <sub>2</sub> | $10^{-12} \sim 10^{-17}$                         | 24        |
| MnO <sub>2</sub> nanospheres                      | $10^{-12} \sim 10^{-15}$                         | 25        |
| La-Ca co-doped $\epsilon$ -MnO <sub>2</sub>       | $10^{-8} \sim 10^{-9}$                           | 26        |
| (PANI)-intercalated V <sub>2</sub> O <sub>5</sub> | $10^{-10} \sim 10^{-12}$                         | 27        |

## References

- 1 C. Liu, Z. Neale, J. Zheng, X. Jia, J. Huang, M. Yan, M. Tian, M. Wang, J. Yang and G. Cao, *Energy Environ. Sci.*, 2019, **12**, 2273-2285.
- 2 J. Zheng, C. Liu, M. Tian, X. Jia, E. Jahrman, G. Seidler, S. Zhang, Y. Liu, Y. Zhang, C. Meng and G. Cao, *Nano Energy*, 2020, **70**, 104519.
- 3 J. Ding, Z. Du, L. Gu, B. Li, L. Wang, S. Wang, Y. Gong and S. Yang, *Adv. Mater.*, 2018, **30**, 1800762.
- 4 J. Ding, Z. Du, B. Li, L. Wang, S. Wang, Y. Gong and S. Yang, *Adv. Mater.*, 2019, **31**, 1904369.
- 5 L. Wang, K.W. Huang, J. Chen and J. Zheng, *Sci. Adv.*, 2019, **5**, eaax4279.
- 6 M. Du, C. Liu, F. Zhang, W. Dong, X. Zhang, Y. Sang, J.-J. Wang, Y. Guo, H. Liu and S. Wang, *Adv. Sci.*, 2020, **7**, 2000083.
- 7 L. Shan, Y. Yang, W. Zhang, H. Chen, G. Fang, J. Zhou and S. Liang, *Energy Storage Mater.*, 2019, **18**, 10-14.
- 8 Y. Li, Z. Huang, P. K. Kalambate, Y. Zhong, Z. Huang, M. Xie, Y. Shen and Y. Huang, *Nano Energy*, 2019, **60**, 752-759.
- 9 Y. Yang, Y. Tang, G. Fang, L. Shan, J. Guo, W. Zhang, C. Wang, L. Wang, J. Zhou and S. Liang, *Energy Environ. Sci.*, 2018, **11**, 3157-3162.
- 10 J. Shin, D. S. Choi, H. J. Lee, Y. Jung and J. W. Choi, *Adv. Energy Mater.*, 2019, **9**, 1900083.
- 11 F. Ming, H. Liang, Y. Lei, S. Kandambeth, M. Eddaoudi and H. N. Alshareef, *ACS Energy Lett.*, 2018, **3**, 2602-2609.
- 12 F. Wan, L. Zhang, X. Dai, X. Wang, Z. Niu and J. Chen, *Nat. Commun.*, 2018, **9**, 1656.
- 13 P. He, G. Zhang, X. Liao, M. Yan, X. Xu, Q. An, J. Liu and L. Mai, *Adv. Energy Mater.*, 2018, **8**, 1702463.

- 14 H. Qin, Z. Yang, L. Chen, X. Chen and L. Wang, *J. Mater. Chem. A*, 2018, **6**, 23757-23765.
- 15 B. Sambandam, V. Soundharrajan, S. Kim, M. H. Alfaruqi, J. Jo, S. Kim, V. Mathew, Y.-k. Sun and J. Kim, *J. Mater. Chem. A*, 2018, **6**, 3850-3856.
- 16 M. Yan, P. He, Y. Chen, S. Wang, Q. Wei, K. Zhao, X. Xu, Q. An, Y. Shuang, Y. Shao, K. T. Mueller, L. Mai, J. Liu and J. Yang, *Adv. Mater.*, 2018, **30**, 1703725.
- 17 L. Chen, Y. Ruan, G. Zhang, Q. Wei, Y. Jiang, T. Xiong, P. He, W. Yang, M. Yan, Q. An and L. Mai, *Chem. Mater.*, 2019, **31**, 699-706.
- 18 T. Wei, Q. Li, G. Yang and C. Wang, *J. Mater. Chem. A*, 2018, **6**, 20402-20410.
- 19 T. Wei, Q. Li, G. Yang and C. Wang, *J. Alloy. Comp.*, 2020, **827**, 154276.
- 20 D. Bin, W. Huo, Y. Yuan, J. Huang, Y. Liu, Y. Zhang, F. Dong, Y. Wang and Y. Xia, *Chem*, 2020, **6**, 968-984.
- 21 Y. Ding, Y. Peng, S. Chen, X. Zhang, Z. Li, L. Zhu, L. Mo and L. Hu, *ACS Appl. Mater. Interfaces*, 2019, **11**, 44109-44117.
- 22 F. Wang, Y. Li, W. Zhu, X. Ge, H. Cui, K. Feng, S. Liu and X. Yang, *ACS Appl. Mater. Interfaces*, 2021, **13**, 34468-34476.
- 23 H. Geng, M. Cheng, B. Wang, Y. Yang, Y. Zhang and C. Li, *Adv. Funct. Mater.*, 2020, **30**, 1907684.
- 24 B. Wu, G. Zhang, M. Yan, T. Xiong, P. He, L. He, X. Xu and L. Q. Mai, *Small*, 2018, **14**, 1703850.
- 25 J. Wang, J. Wang, H. Liu, C. Wei and F. Kang, *J. Mater. Chem. A*, 2019, **7**, 13727-13735.
- 26 M. Zhang, W. Wu, J. Luo, H. Zhang, J. Liu, X. Liu, Y. Yang and X. Lu, *J. Mater. Chem. A*, 2020, **8**, 11642-11648.
- 27 S. Liu, H. Zhu, B. Zhang, G. Li, H. Zhu, Y. Ren, H. Geng, Y. Yang, Q. Liu and C.C. Li, *Adv. Mater.*, 2020, **32**, 2001113.
